# Supplementary material for: Enhancement mechanism of novel heterojunction Z-scheme-type composite BiOBr/ZnIn2S4 to degrade Congo red
Source: Royal Society of Chemistry journal article supplement (doi:10.1039/d4cy00912f), 2024-01-01
Supplement: d4cy00912f1.pdf [file d4cy00912f1.pdf]

## Supplementary Information

# Enhancement mechanism of a novel heterojunction Z-scheme-type composite BiOBr/ZnIn<sub>2</sub>S<sub>4</sub> to degrade Congo Red

Junchao Huang<sup>1a</sup>, Borui Li<sup>1a</sup>, Jiaying Yu<sup>1</sup>, Zhan Shu<sup>1</sup>, Ming Li\*

<sup>1</sup>College of Forestry, Northeast Forestry University, Harbin 150040, China

<sup>a</sup>These authors contributed equally to this work.

\*Corresponding author: Prof. Ming Li

College of Forestry, Northeast Forestry University, Harbin 150040, China

Tel: 86-451-82192120

E-mail: [liming1986@nefu.edu.cn](mailto:liming1986@nefu.edu.cn) (M. Li)

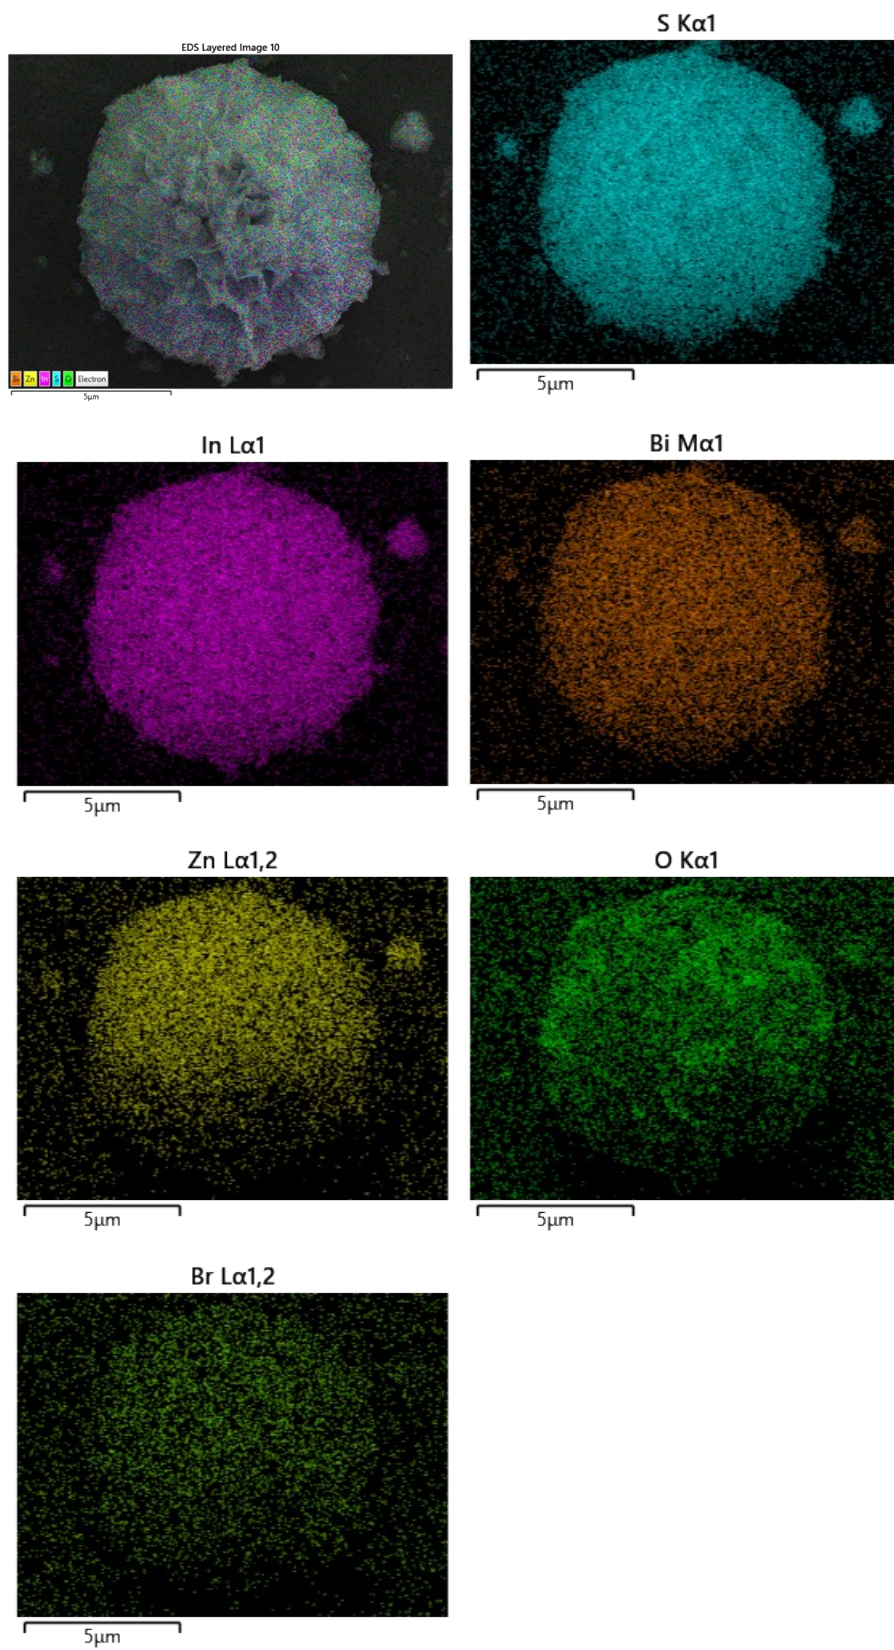

**Fig. S1.** Energy-dispersive X-Ray spectrometry mapping of BiOBr/ZIS-7

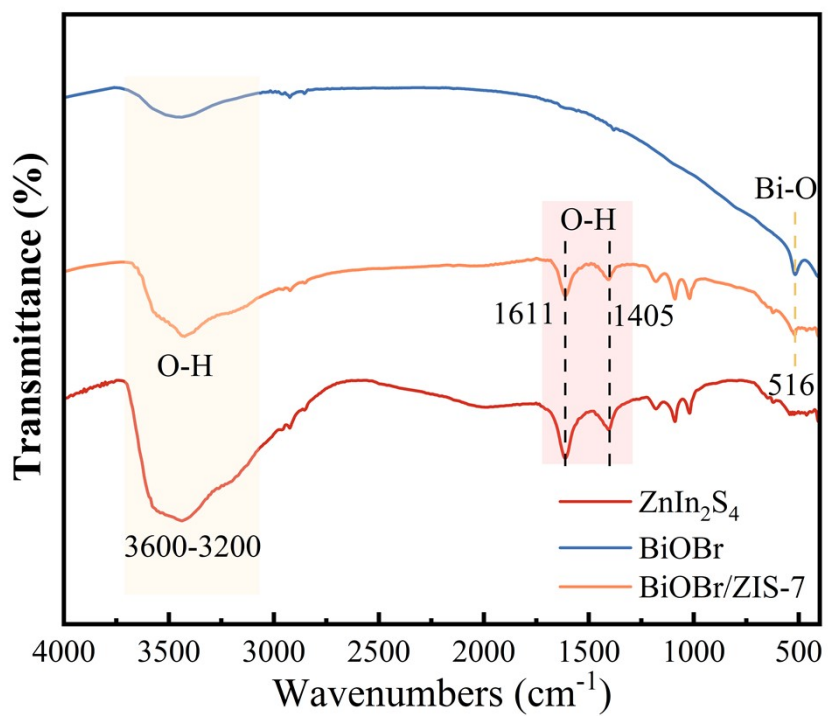

**Fig. S2.** FT-IR spectrum of synthesized BiOBr, ZnIn<sub>2</sub>S<sub>4</sub>, and BiOBr/ZIS-7 samples for the region of 400-4000 cm<sup>-1</sup>.

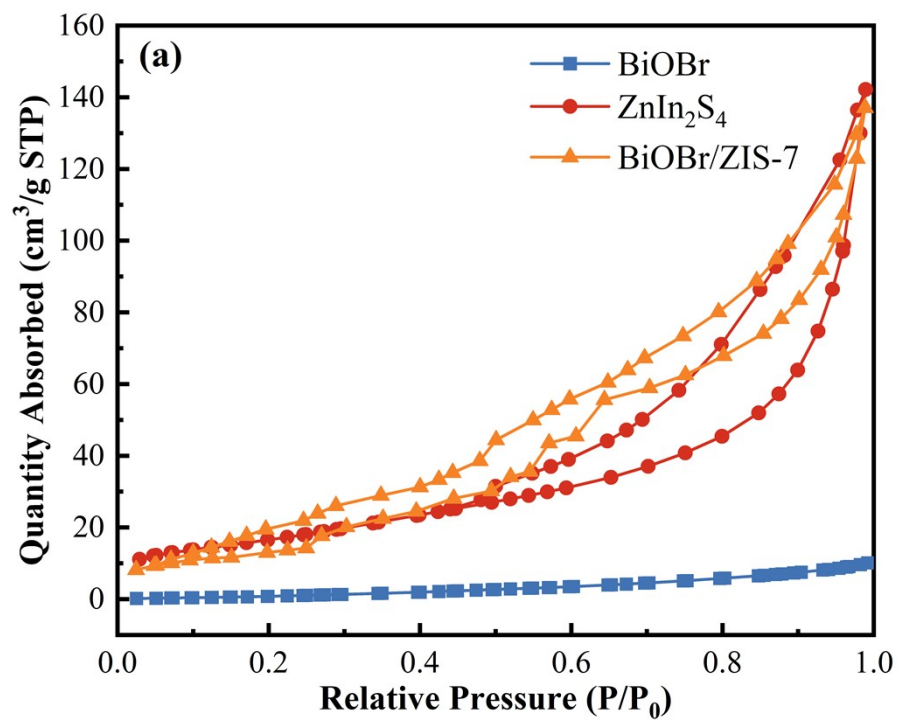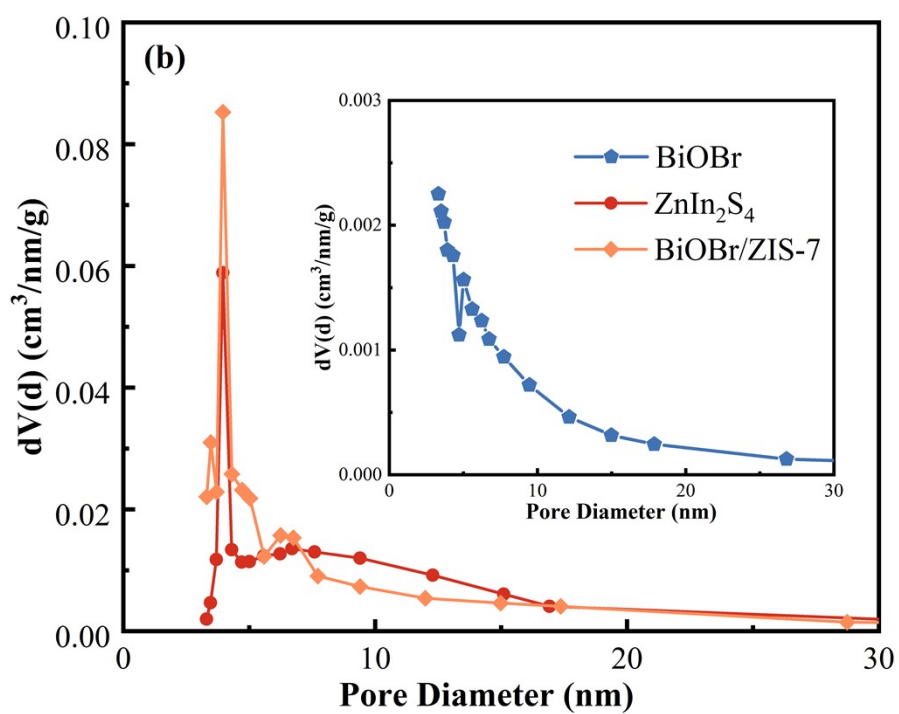

**Fig. S3.**  $\text{N}_2$  adsorption-desorption curves (a) and pore size distributions (b) of the as-prepared samples.

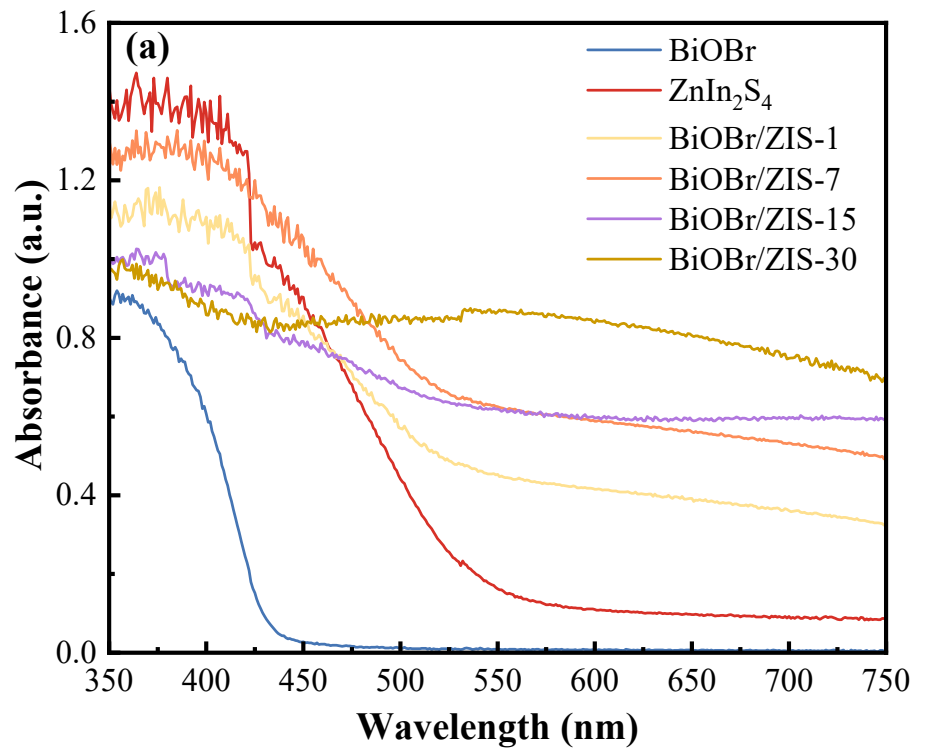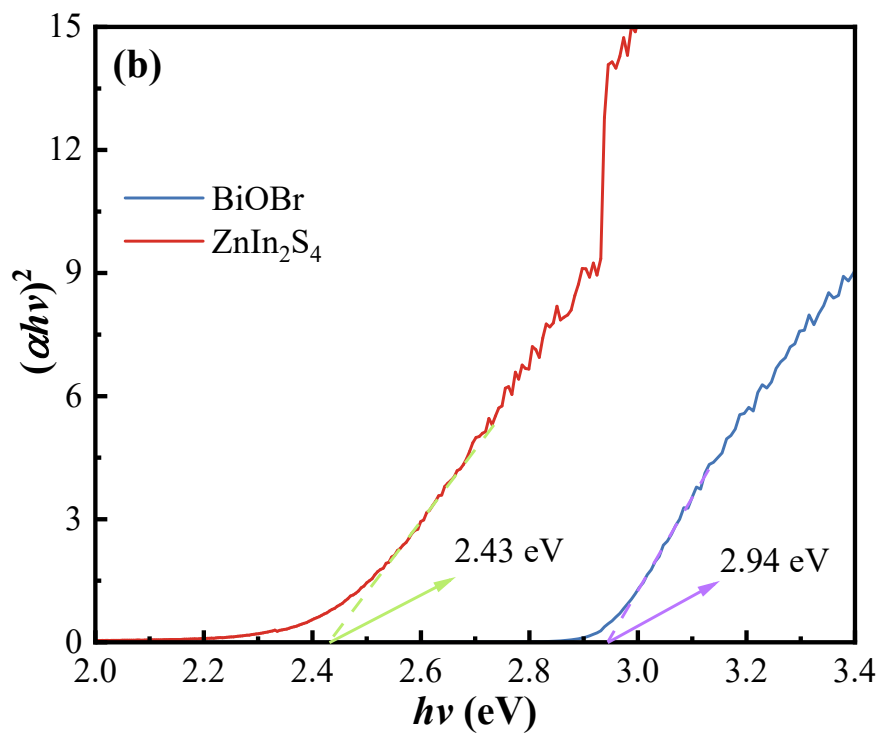

**Fig. S4.** UV-Vis diffuse reflectance spectra of samples (a); Plots of  $(\alpha h\nu)^2$  versus  $h\nu$  obtained from BiOBr and ZnIn<sub>2</sub>S<sub>4</sub> (b).

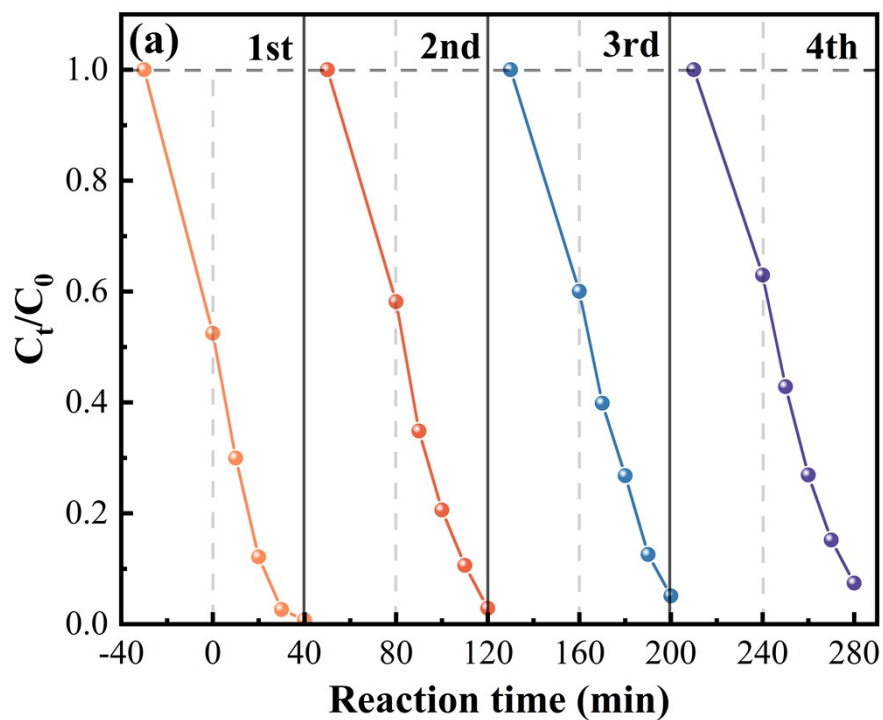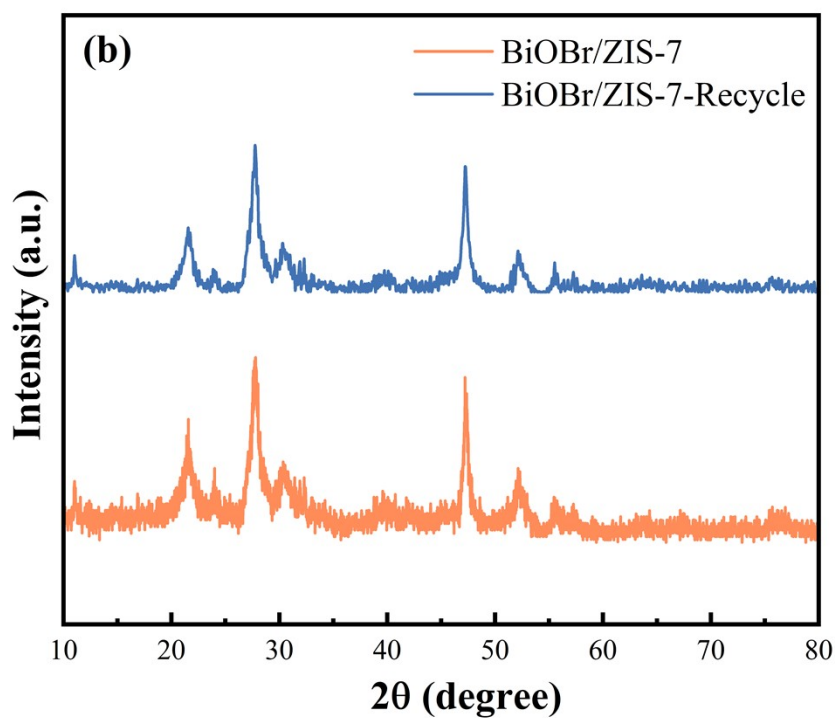

**Fig. S5.** Cycling experiments of Congo red degradation by BiOBr/ZIS-7 under visible light irradiation (a); XRD of reused composites (BiOBr/ZIS-7-Recycle) and original composites (BiOBr/ZIS-7) (b).

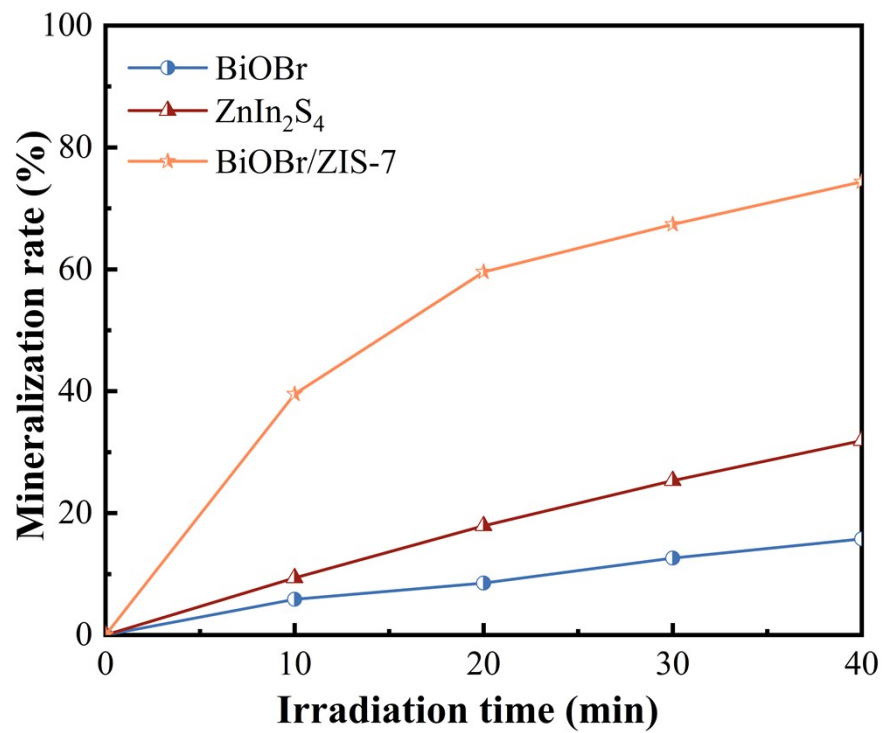

**Fig. S6.** Mineralization rates of Congo red decomposed by catalysts under visible light.
